# Supplementary material
Source: PubMed Central journal article supplement (PMC4128479)
Supplement: NIHMS579568-supplement-Supp_Tables.pdf [file NIHMS579568-supplement-Supp_Tables.pdf]

|               |                |   |    |   |    |    |     |     |      |     |      |     |      |      |      |      |
|---------------|----------------|---|----|---|----|----|-----|-----|------|-----|------|-----|------|------|------|------|
|               | AWSQDGSQNTLY   | 0 | 0  | 0 | 0  | 0  | 0   | 0   | 0    | 169 | 0    | 0   | 0    | 0    | 0    | 0    |
|               | AWSRDYNQAPL    | 0 | 0  | 0 | 0  | 0  | 0   | 0   | 1    | 148 | 0    | 0   | 0    | 0    | 0    | 0    |
|               | AWSRDSFPKDY    | 0 | 0  | 0 | 0  | 0  | 0   | 0   | 66   | 135 | 0    | 0   | 0    | 0    | 0    | 0    |
|               | AWSRDRSNSDYT   | 0 | 1  | 0 | 0  | 0  | 6   | 0   | 3    | 122 | 0    | 0   | 0    | 0    | 0    | 0    |
| Th17-Ms#6     | AWSRGGEQY      | 0 | 0  | 0 | 0  | 0  | 0   | 0   | 0    | 1   | 2304 | 71  | 0    | 0    | 0    | 0    |
|               | AWSLTPSAETLY   | 0 | 0  | 0 | 0  | 0  | 0   | 0   | 1307 | 88  | 881  | 89  | 0    | 0    | 0    | 0    |
|               | AWSLWGTQNTLY   | 0 | 0  | 0 | 0  | 0  | 0   | 0   | 1    | 0   | 405  | 391 | 0    | 0    | 0    | 0    |
|               | AWSLGAEQF      | 0 | 0  | 0 | 1  | 0  | 3   | 0   | 0    | 0   | 250  | 22  | 0    | 3    | 0    | 0    |
|               | AWSYTGGNTEVF   | 0 | 0  | 0 | 0  | 0  | 0   | 0   | 0    | 0   | 206  | 15  | 0    | 0    | 0    | 0    |
|               | AWSLGTGNTEVF   | 5 | 0  | 0 | 0  | 5  | 0   | 58  | 1    | 72  | 14   | 169 | 9    | 1    | 0    | 0    |
|               | AWSYSTSQNTLY   | 0 | 0  | 0 | 0  | 0  | 0   | 0   | 0    | 0   | 138  | 7   | 0    | 0    | 0    | 0    |
|               | AWSWDSGNTRY    | 0 | 0  | 0 | 0  | 0  | 0   | 0   | 0    | 0   | 96   | 10  | 0    | 0    | 0    | 0    |
|               | AWSLGVNQDTQY   | 0 | 0  | 0 | 0  | 14 | 0   | 0   | 2    | 0   | 94   | 11  | 0    | 0    | 0    | 0    |
|               | ATGGADSDYT     | 0 | 0  | 0 | 0  | 0  | 0   | 0   | 0    | 0   | 94   | 108 | 0    | 0    | 0    | 0    |
| Non-Th17-Ms#6 | AWGHNQDTQY     | 0 | 0  | 0 | 0  | 0  | 0   | 0   | 0    | 0   | 56   | 565 | 0    | 0    | 0    | 0    |
|               | AWSPGLGTTGQLY  | 0 | 0  | 0 | 0  | 0  | 0   | 0   | 0    | 0   | 2    | 552 | 0    | 0    | 0    | 0    |
|               | AWSLWGTQNTLY   | 0 | 0  | 0 | 0  | 0  | 0   | 0   | 1    | 0   | 0    | 405 | 391  | 0    | 0    | 0    |
|               | AWSRDWGQNTLY   | 0 | 0  | 0 | 0  | 0  | 0   | 0   | 0    | 487 | 0    | 306 | 0    | 0    | 12   | 1604 |
|               | AWSLGTDGNTLY   | 0 | 1  | 0 | 0  | 0  | 0   | 0   | 0    | 0   | 10   | 270 | 41   | 7    | 0    | 1    |
|               | AWSRQDQTY      | 0 | 22 | 0 | 0  | 0  | 0   | 0   | 0    | 9   | 1    | 265 | 0    | 0    | 0    | 6    |
|               | AWSTGGGQNTLY   | 0 | 0  | 0 | 0  | 0  | 0   | 0   | 0    | 0   | 1    | 247 | 30   | 67   | 0    | 0    |
|               | AWSLDRFQDTQY   | 0 | 0  | 0 | 0  | 0  | 0   | 0   | 0    | 0   | 83   | 155 | 0    | 0    | 0    | 0    |
|               | AWGDNQDTQY     | 0 | 0  | 0 | 0  | 0  | 0   | 0   | 0    | 0   | 0    | 150 | 0    | 0    | 0    | 0    |
|               | AWSLGFISNERLF  | 0 | 0  | 0 | 0  | 0  | 0   | 0   | 0    | 0   | 0    | 112 | 0    | 0    | 0    | 0    |
| Th17-Ms#7     | AWSRQGSSEATLY  | 0 | 0  | 0 | 0  | 0  | 3   | 0   | 0    | 2   | 0    | 0   | 1479 | 60   | 0    | 0    |
|               | AWSRGTGDETEVF  | 0 | 0  | 0 | 0  | 0  | 140 | 4   | 0    | 0   | 0    | 0   | 805  | 45   | 0    | 0    |
|               | AWSLGTGSTEVF   | 2 | 0  | 0 | 0  | 0  | 0   | 0   | 4    | 0   | 0    | 2   | 0    | 777  | 56   | 0    |
|               | AWSLGPSNTQNTLY | 0 | 0  | 0 | 0  | 0  | 0   | 0   | 0    | 0   | 0    | 0   | 0    | 593  | 14   | 0    |
|               | AWSLVTTNTGQLY  | 0 | 0  | 0 | 0  | 0  | 0   | 0   | 0    | 0   | 0    | 0   | 0    | 282  | 5    | 0    |
|               | AWSLSEATLY     | 0 | 1  | 0 | 3  | 0  | 0   | 0   | 0    | 2   | 10   | 0   | 0    | 273  | 120  | 0    |
|               | AWSSGGGETLY    | 0 | 0  | 0 | 0  | 0  | 0   | 0   | 0    | 0   | 0    | 0   | 0    | 293  | 16   | 0    |
|               | AWSLGQGATGQLY  | 0 | 0  | 0 | 0  | 0  | 0   | 0   | 0    | 0   | 0    | 0   | 0    | 163  | 10   | 0    |
|               | AWSLSPSQNTLY   | 0 | 0  | 0 | 0  | 0  | 0   | 0   | 0    | 0   | 0    | 0   | 0    | 120  | 5    | 0    |
|               | AWSRGLGYQDTQY  | 0 | 0  | 0 | 0  | 0  | 0   | 0   | 0    | 0   | 0    | 0   | 0    | 114  | 1254 | 0    |
| Non-Th17-Ms#7 | AWSRGLGYQDTQY  | 0 | 0  | 0 | 0  | 0  | 0   | 0   | 0    | 0   | 0    | 0   | 114  | 1254 | 0    | 0    |
|               | AWSLGENTLY     | 0 | 0  | 0 | 1  | 0  | 0   | 0   | 0    | 14  | 0    | 0   | 1    | 388  | 0    | 0    |
|               | AWNWAETLY      | 0 | 0  | 0 | 0  | 0  | 0   | 0   | 0    | 0   | 0    | 0   | 8    | 215  | 0    | 0    |
|               | AWSRQNSDYT     | 0 | 16 | 0 | 14 | 0  | 0   | 0   | 0    | 4   | 0    | 18  | 0    | 164  | 0    | 62   |
|               | AWSLDREVF      | 0 | 1  | 0 | 0  | 0  | 0   | 0   | 0    | 0   | 0    | 0   | 48   | 121  | 0    | 0    |
|               | AWSLSEATLY     | 0 | 1  | 0 | 3  | 0  | 0   | 0   | 0    | 2   | 10   | 0   | 0    | 273  | 120  | 0    |
|               | AWSLGQSNLERLF  | 0 | 0  | 0 | 2  | 0  | 0   | 0   | 0    | 0   | 0    | 0   | 0    | 100  | 0    | 0    |
|               | AWLGSSAETLY    | 0 | 0  | 0 | 0  | 0  | 0   | 0   | 0    | 0   | 0    | 0   | 3    | 99   | 0    | 0    |
|               | AWSRGSDTQY     | 0 | 0  | 0 | 1  | 0  | 0   | 0   | 0    | 0   | 0    | 0   | 1    | 86   | 0    | 0    |
|               | AWSLGIQNTLY    | 0 | 0  | 0 | 0  | 0  | 0   | 0   | 0    | 0   | 0    | 0   | 1    | 82   | 0    | 0    |
| Th17-Ms#8     | AWSRDSSAETLY   | 0 | 0  | 0 | 3  | 3  | 0   | 3   | 0    | 2   | 0    | 0   | 0    | 0    | 1091 | 1    |
|               | AWSPGVQKRC     | 0 | 0  | 0 | 0  | 0  | 0   | 0   | 0    | 0   | 0    | 0   | 0    | 0    | 915  | 0    |
|               | AWGFTQDTQY     | 0 | 0  | 0 | 0  | 0  | 0   | 0   | 0    | 0   | 0    | 0   | 0    | 0    | 368  | 6    |
|               | AWSLQISNERLF   | 0 | 0  | 0 | 0  | 0  | 0   | 355 | 14   | 0   | 0    | 0   | 0    | 1    | 324  | 14   |
|               | AWSPGGSEATLY   | 0 | 0  | 0 | 0  | 0  | 0   | 0   | 0    | 0   | 0    | 0   | 0    | 0    | 235  | 29   |
|               | AWSPGLGGPGQLY  | 0 | 0  | 0 | 0  | 0  | 0   | 0   | 0    | 0   | 0    | 0   | 0    | 0    | 226  | 11   |
|               | AWSLRASANSDYT  | 0 | 0  | 0 | 0  | 0  | 0   | 0   | 0    | 0   | 0    | 0   | 0    | 0    | 144  | 0    |
|               | AWDRGGNTLY     | 0 | 0  | 0 | 0  | 0  | 0   | 0   | 0    | 0   | 0    | 0   | 0    | 0    | 138  | 1    |
|               | AWSLTGANTEVF   | 0 | 0  | 0 | 0  | 0  | 0   | 0   | 0    | 0   | 0    | 0   | 0    | 0    | 98   | 0    |
|               | AWSPATGGYEY    | 0 | 0  | 0 | 0  | 0  | 0   | 0   | 0    | 0   | 0    | 0   | 0    | 0    | 97   | 22   |
| Non-Th17-Ms#8 | AWSRDWGQNTLY   | 0 | 0  | 0 | 0  | 0  | 0   | 0   | 0    | 487 | 0    | 306 | 0    | 0    | 12   | 1604 |
|               | AWSLWGSSYEY    | 0 | 57 | 0 | 2  | 0  | 0   | 0   | 0    | 0   | 0    | 0   | 0    | 0    | 303  | 0    |
|               | AWSRDGSSEATLY  | 0 | 0  | 0 | 0  | 0  | 0   | 0   | 0    | 0   | 0    | 0   | 0    | 0    | 0    | 228  |
|               | AWSLAGVNTGQLY  | 0 | 0  | 0 | 0  | 0  | 0   | 0   | 0    | 0   | 0    | 0   | 0    | 0    | 0    | 113  |
|               | AWSHWGSSYEY    | 0 | 2  | 0 | 5  | 0  | 1   | 0   | 0    | 0   | 1    | 0   | 0    | 0    | 4    | 101  |
|               | AWTLWGDSSYEY   | 0 | 0  | 0 | 0  | 0  | 0   | 0   | 0    | 0   | 0    | 0   | 0    | 0    | 0    | 94   |
|               | AWGEDWGGQNTLY  | 0 | 0  | 0 | 0  | 0  | 0   | 0   | 0    | 0   | 0    | 0   | 0    | 0    | 0    | 91   |
|               | AWSLTGGYAEQF   | 0 | 0  | 0 | 0  | 3  | 1   | 0   | 0    | 0   | 0    | 0   | 0    | 0    | 73   | 63   |
|               | AWSRQNSDYT     | 0 | 16 | 0 | 14 | 0  | 0   | 0   | 0    | 4   | 0    | 18  | 0    | 164  | 0    | 62   |
|               | AWSRQNAEQF     | 0 | 0  | 0 | 0  | 0  | 0   | 1   | 0    | 0   | 0    | 0   | 0    | 0    | 1    | 61   |

Supplementary Table 1. Top10 sequences in high-throughput sequencing. Ten most prevalent V 14-CDR3 sequences are listed for each of the sixteen samples. This table shows numbers of these sequences found by pyrosequencing.
